# Supplementary material
Source: Elsevier journal article supplement (https://comptes-rendus.academie-sciences.fr/chimie/article/10.1016/j.crci.2010.03.019/file/attach/mmc2.pdf)
Supplement: mmc2 [file mmc2.pdf]

# checkCIF/PLATON report (basic structural check)

No syntax errors found.

Please wait while processing ....

[CIF dictionary](#)

[Interpreting this report](#)

## Datablock: Compound2d

Bond precision: C-C = 0.0016 A Wavelength=0.71073  
Cell: a=11.8968(3) b=7.4738(2) c=24.2583(7)  
alpha=90 beta=97.199(1) gamma=90

Temperature: 123 K

|                        | Calculated     | Reported       |
|------------------------|----------------|----------------|
| Volume                 | 2139.91(10)    | 2139.91(10)    |
| Space group            | P 21/c         | P 21/c         |
| Hall group             | -P 2ybc        | -P 2ybc        |
| Moiety formula         | C17 H37 Al2 Nd | C17 H37 Al2 Nd |
| Sum formula            | C17 H37 Al2 Nd | C17 H37 Al2 Nd |
| Mr                     | 439.67         | 439.67         |
| Dx, g cm <sup>-3</sup> | 1.365          | 1.365          |
| Z                      | 4              | 4              |
| Mu (mm <sup>-1</sup> ) | 2.500          | 2.500          |
| F000                   | 900.0          | 900.0          |
| F000'                  | 899.86         |                |
| h, k, lmax             | 16, 10, 34     | 16, 10, 34     |
| Nref                   | 6321           | 6307           |
| Tmin, Tmax             | 0.436, 0.577   | 0.354, 0.603   |
| Tmin'                  | 0.270          |                |

Correction method= MULTI-SCAN

Data completeness= 0.998 Theta(max)= 30.140

R(reflections)= 0.0137( 6129) wR2(reflections)= 0.0354( 6307)

S = 1.177 Npar= 241

The following ALERTS were generated. Each ALERT has the format

**test-name ALERT alert-type alert-level.**

Click on the hyperlinks for more details of the test.

### Alert level A

|                                   |                     |                  |             |
|-----------------------------------|---------------------|------------------|-------------|
| <a href="#">PLAT390_ALERT_3_A</a> | Deviating Methyl C1 | X-C-H Bond Angle | 63.30 Deg.  |
| <a href="#">PLAT390_ALERT_3_A</a> | Deviating Methyl C1 | X-C-H Bond Angle | 141.30 Deg. |
| <a href="#">PLAT390_ALERT_3_A</a> | Deviating Methyl C1 | X-C-H Bond Angle | 131.80 Deg. |
| <a href="#">PLAT390_ALERT_3_A</a> | Deviating Methyl C2 | X-C-H Bond Angle | 139.40 Deg. |
| <a href="#">PLAT390_ALERT_3_A</a> | Deviating Methyl C2 | X-C-H Bond Angle | 63.10 Deg.  |
| <a href="#">PLAT390_ALERT_3_A</a> | Deviating Methyl C2 | X-C-H Bond Angle | 131.40 Deg. |
| <a href="#">PLAT390_ALERT_3_A</a> | Deviating Methyl C4 | X-C-H Bond Angle | 125.80 Deg. |
| <a href="#">PLAT390_ALERT_3_A</a> | Deviating Methyl C5 | X-C-H Bond Angle | 172.20 Deg. |
| <a href="#">PLAT390_ALERT_3_A</a> | Deviating Methyl C5 | X-C-H Bond Angle | 72.30 Deg.  |
| <a href="#">PLAT390_ALERT_3_A</a> | Deviating Methyl C5 | X-C-H Bond Angle | 82.00 Deg.  |
| <a href="#">PLAT390_ALERT_3_A</a> | Deviating Methyl C5 | X-C-H Bond Angle | 92.80 Deg.  |
| <a href="#">PLAT390_ALERT_3_A</a> | Deviating Methyl C5 | X-C-H Bond Angle | 126.10 Deg. |
| <a href="#">PLAT390_ALERT_3_A</a> | Deviating Methyl C6 | X-C-H Bond Angle | 72.70 Deg.  |
| <a href="#">PLAT390_ALERT_3_A</a> | Deviating Methyl C6 | X-C-H Bond Angle | 171.90 Deg. |
| <a href="#">PLAT390_ALERT_3_A</a> | Deviating Methyl C6 | X-C-H Bond Angle | 82.50 Deg.  |
| <a href="#">PLAT390_ALERT_3_A</a> | Deviating Methyl C6 | X-C-H Bond Angle | 127.10 Deg. |
| <a href="#">PLAT390_ALERT_3_A</a> | Deviating Methyl C6 | X-C-H Bond Angle | 92.30 Deg.  |

### Alert level B

|                                   |                     |                        |            |
|-----------------------------------|---------------------|------------------------|------------|
| <a href="#">PLAT390_ALERT_3_B</a> | Deviating Methyl C1 | X-C-H Bond Angle ..... | 95.10 Deg. |
| <a href="#">PLAT390_ALERT_3_B</a> | Deviating Methyl C2 | X-C-H Bond Angle ..... | 96.20 Deg. |

---

### ● Alert level C

|                                   |                     |                        |             |
|-----------------------------------|---------------------|------------------------|-------------|
| <a href="#">PLAT222_ALERT_3_C</a> | Large Non-Solvent H | Ueq(max)/Ueq(min) ...  | 3.94 Ratio  |
| <a href="#">PLAT390_ALERT_3_C</a> | Deviating Methyl C5 | X-C-H Bond Angle ..... | 117.80 Deg. |
| <a href="#">PLAT390_ALERT_3_C</a> | Deviating Methyl C6 | X-C-H Bond Angle ..... | 116.60 Deg. |

---

### ● Alert level G

|                                   |                                                  |    |
|-----------------------------------|--------------------------------------------------|----|
| <a href="#">PLAT860_ALERT_3_G</a> | Note: Number of Least-Squares Restraints .....   | 30 |
| <a href="#">PLAT164_ALERT_4_G</a> | Nr. of Refined C-H H-Atoms in Heavy-Atom Struct. | 16 |

---

- 17 **ALERT level A** = In general: serious problem
  - 2 **ALERT level B** = Potentially serious problem
  - 3 **ALERT level C** = Check and explain
  - 2 **ALERT level G** = General alerts; check
  
  - 0 ALERT type 1 CIF construction/syntax error, inconsistent or missing data
  - 0 ALERT type 2 Indicator that the structure model may be wrong or deficient
  - 23 ALERT type 3 Indicator that the structure quality may be low
  - 1 ALERT type 4 Improvement, methodology, query or suggestion
  - 0 ALERT type 5 Informative message, check
- 

## Publication of your CIF in IUCr journals

A basic structural check has been run on your CIF. These basic checks will be run on all CIFs submitted for publication in IUCr journals (*Acta Crystallographica*, *Journal of Applied Crystallography*, *Journal of Synchrotron Radiation*); however, if you intend to submit to *Acta Crystallographica Section C* or *E*, you should make sure that [full publication checks](#) are run on the final version of your CIF prior to submission.

## Publication of your CIF in other journals

Please refer to the *Notes for Authors* of the relevant journal for any special instructions relating to CIF submission.

---

PLATON version of 13/08/2009; check.def file version of 12/08/2009

## Datablock Compound2d - ellipsoid plot

7 Y  
PLATON-Dec 13 18:55:00 2009 - (130809)

NOMOVE FORCED

Prob = 50  
Temp = 123

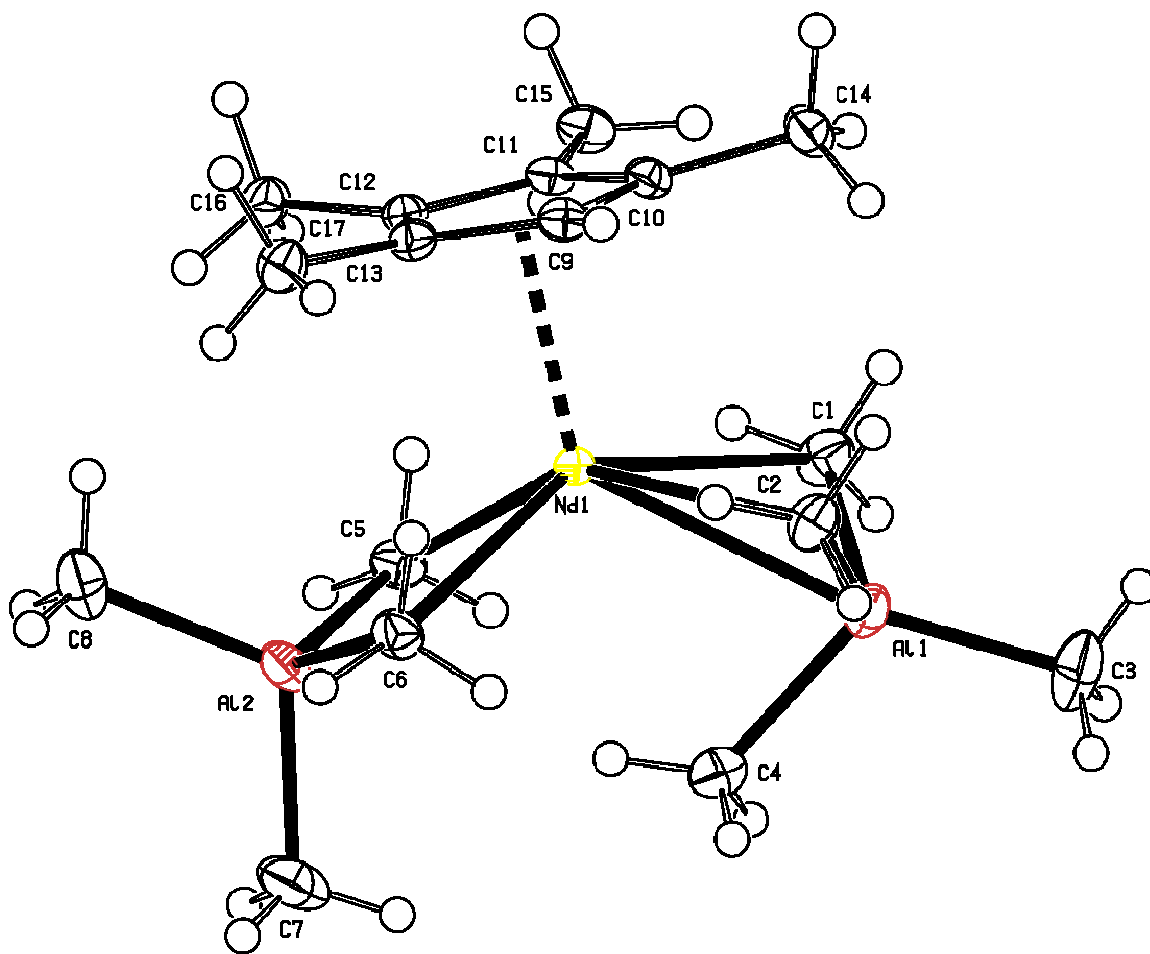

Z -150 Compound2dP 21/c R = 0.01 RES= 0 -78 X

[Download CIF editor \(publCIF\) from the IUCr](#)  
[Download CIF editor \(enCIFer\) from the CCDC](#)  
[Test a new CIF entry](#)
